# Supplementary material for: ZnO-nanoparticle-assembled cloth for flexible photodetectors and recyclable photocatalysts
Source: Royal Society of Chemistry journal article supplement (doi:10.1039/c2jm16781f), 2012-01-01
Supplement: c2jm16781f.pdf [file c2jm16781f.pdf]

## Electronic Supplementary Information

### ZnO-Nanoparticle-Assembled Cloth for Flexible Photodetectors and Recyclable Photocatalysts

Bin Liu,<sup>a</sup> Zhuoran Wang,<sup>a</sup> Yuan Dong,<sup>a</sup> Yuguang Zhu,<sup>a</sup> Yue Gong,<sup>a</sup> Sihan Ran,<sup>a</sup>  
Zhe Liu,<sup>a</sup> Jing Xu,<sup>a</sup> Zhong Xie,<sup>a</sup> Di Chen<sup>\*a</sup> and Guozhen Shen<sup>\*a</sup>

<sup>a</sup> Wuhan National Laboratory for Optoelectronics (WNLO) and College of Optoelectronic Science and Engineering, Huazhong University of Science and Technology (HUST), Wuhan, 430074, P. R. China.

Address correspondence to [dichen@mail.hust.edu.cn](mailto:dichen@mail.hust.edu.cn); [gzshen@mail.hust.edu.cn](mailto:gzshen@mail.hust.edu.cn)

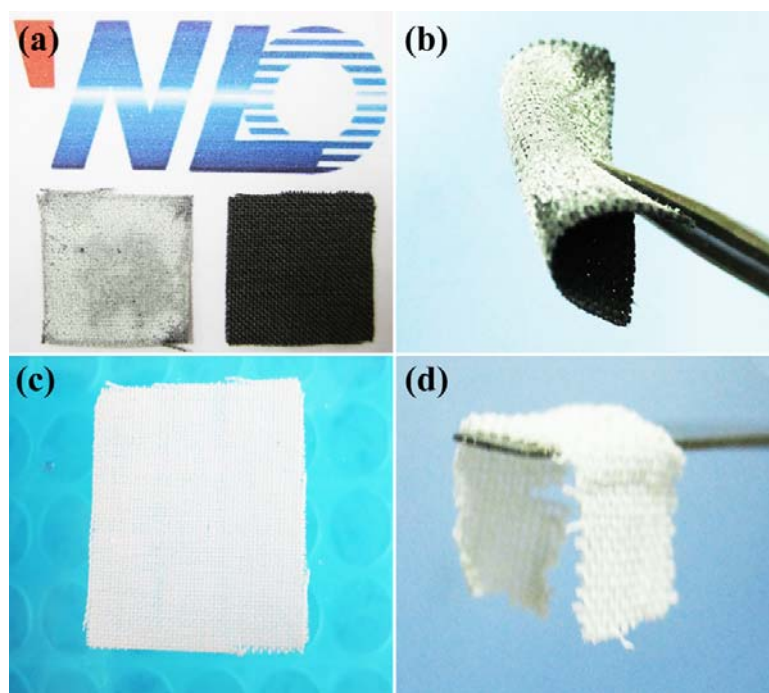

Figure S1 (a) Optical image of the ZnO/C cloth (left) and pure carbon cloth (right). (b) Stretchable ZnO/C cloth precursor. (c) Digital photo of a flat ZnO cloth (d) The pure ZnO cloth rolled up with a iron sheet, which shows its good flexibility.

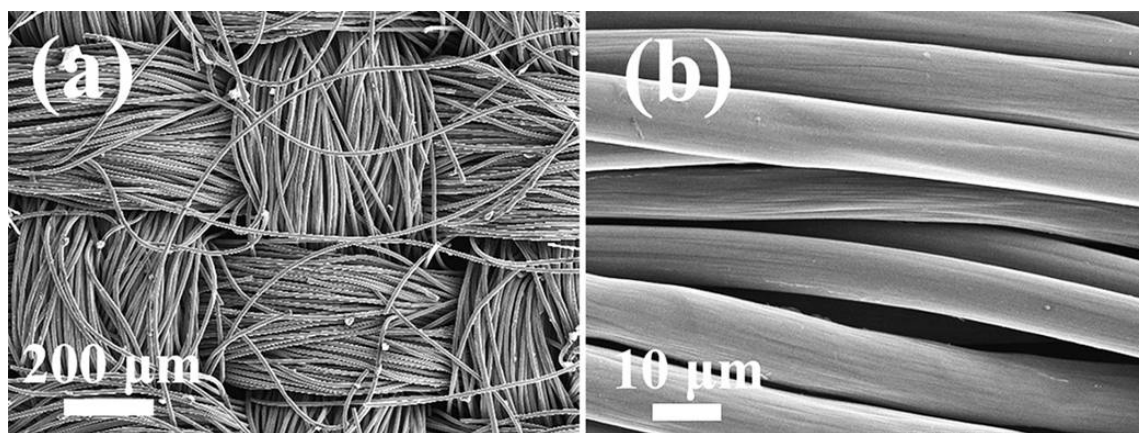

Figure S2 Figures (a) and (b) illustrate low and high magnification FESEM images of the carbon cloth, respectively.

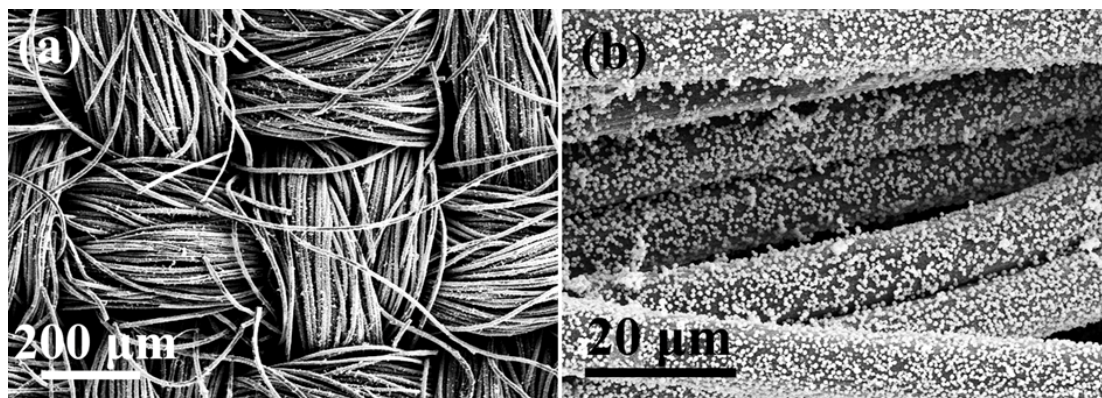

Figure S3 SEM images of ZnO nanoparticle-assembled flexible cloth.

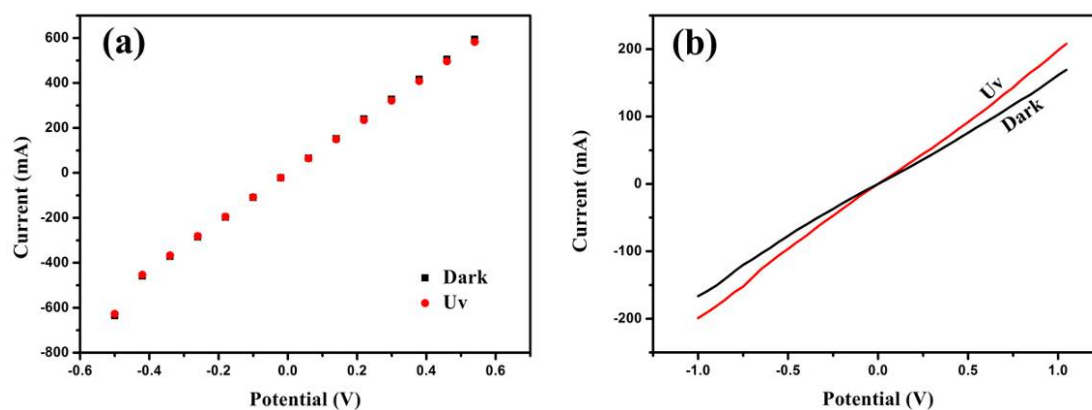

Figure S4 The *I*-*V* characteristics of (a) the carbon cloth and (b) the ZnO/C cloth, respectively.
